# Supplementary material for: A theoretical study of the electrochemical reduction of CO2 on cerium dioxide supported palladium single atoms and nanoparticles
Source: Royal Society of Chemistry journal article supplement (doi:10.1039/d1cp03835d), 2021-01-01
Supplement: d1cp03835d1.pdf [file d1cp03835d1.pdf]

## SUPPORTING INFORMATION

# **Theoretical study of the electrochemical reduction of CO<sub>2</sub> on cerium dioxide supported palladium single atoms and nanoparticles**

*Yannv Guo,<sup>a</sup> Haiyan Zhu,<sup>\*a</sup> He Zhao,<sup>a</sup> Qinfu Zhao,<sup>a</sup> Caihua Zhou,<sup>b</sup> Bingbing Suo,<sup>a</sup>*

*Wenli Zou,<sup>a</sup> Zhenyi Jiang,<sup>a</sup> and Yawei Li<sup>\*a</sup>*

<sup>a</sup> Shaanxi Key Laboratory for Theoretical Physics Frontiers, Institute of Modern Physics,  
Northwest University, Xi'an, Shaanxi 710069, China

<sup>b</sup> School of Chemistry and Chemical Engineering, Xianyang Normal University,  
Xianyang, Shaanxi 712000, China

### **Corresponding Authors**

\*E-mail: zhuhaiyan@nwu.edu.cn

\*E-mail: yawei.li@epfl.ch

## **Artificial bee colony algorithm in ABCluster**

The AB Cluster procedure<sup>1</sup> uses an artificial bee colony for global search of the cluster, which is an efficient, user-friendly, and free software to perform the global optimization of clusters by the ABC algorithm. The artificial bee colony (ABC) algorithm, which is a swarm intelligence based one, was first proposed by Karaboga in 2005.<sup>2</sup> It was inspired by the foraging behavior of honey bee colonies. In these colonies, bees want to find the best source of nectar. To achieve this goal efficiently, bees are specialized for different tasks. In the model of the ABC algorithm, there are three kinds of bees: employed, onlooker, and scout bees. Each bee can find nectar and estimate its “quality”. More importantly, it can share this information with other bees by, e.g., a waggle dance. This communication between individuals is the basis of the colony's random and feedback behavior. During a search cycle, employed bees search for new sources of nectar based on their knowledge as well as that of other bees. The onlooker bees then communicate with the employed bees to search for new nectar sources around "good" nectar sources. Based on feedback from the employed and onlooker bees, the low-quality nectar source is discarded and the scout bees search for a new nectar source. After several cycles, the "best" nectar source is finally selected.

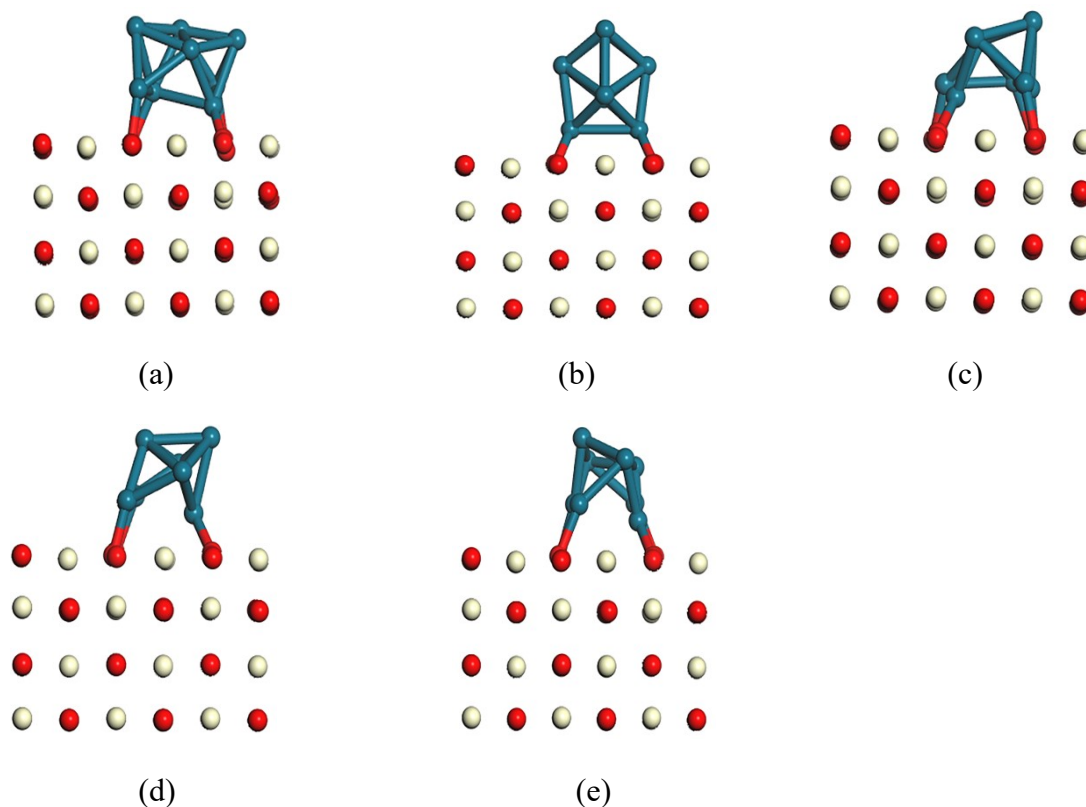

**Figure S1.** Possible binding structures of Pd<sub>8</sub> clusters deposited on CeO<sub>2</sub> substrates.

Red: O atoms; blue : Pd atoms; yellow: Ce atoms;brown:C atoms.

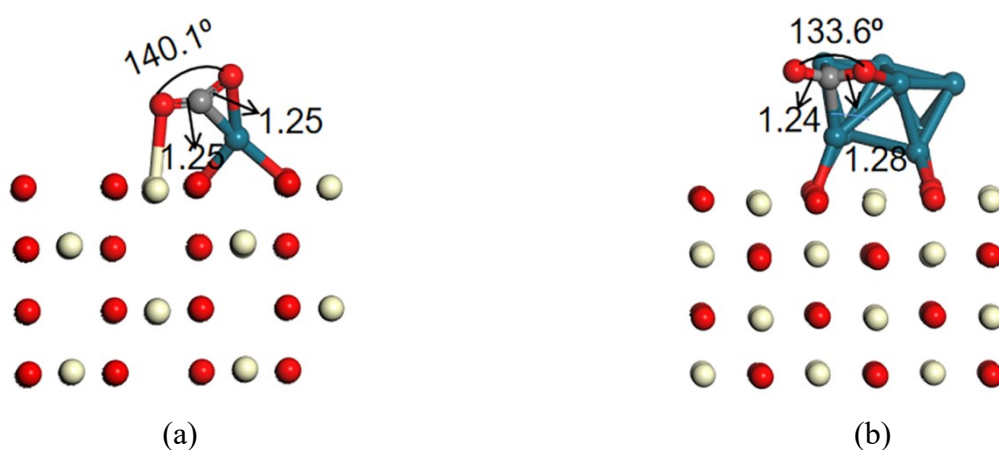

**Figure S2.** (a) Side view of optimized structure of Pd/CeO<sub>2</sub> for CO<sub>2</sub> adsorption(b)Side view of optimized structure of Pd<sub>8</sub>/CeO<sub>2</sub> for CO<sub>2</sub> adsorption. Red: O atoms; blue : Pd atoms; yellow: Ce atoms;brown:C atoms.

### Density of states (DOS) analysis of structures for CO<sub>2</sub> adsorption

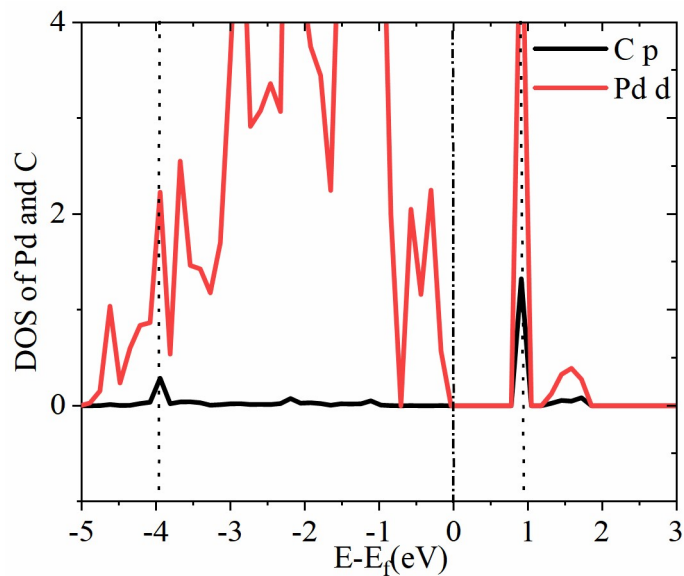

**Figure S3.** Projected density of states (DOSs) of Pd atom (red line) and C atom (black line) directly involved in bonding with C for structure b in Table 1. The dotted dash line indicates Fermi level; the dashed lines indicate direct overlap between C and Pd.

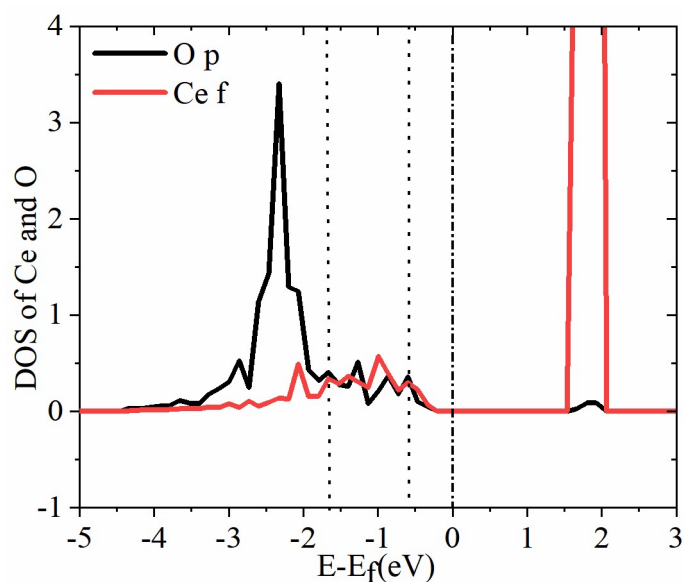

**Figure S4.** Projected density of states (DOSs) of Ce atom (red line) and O atom (black line) directly involved in bonding with Ce for structure d in Table 1. The dotted dash

line indicates Fermi level; the dashed lines indicate direct overlap between Ce and O.

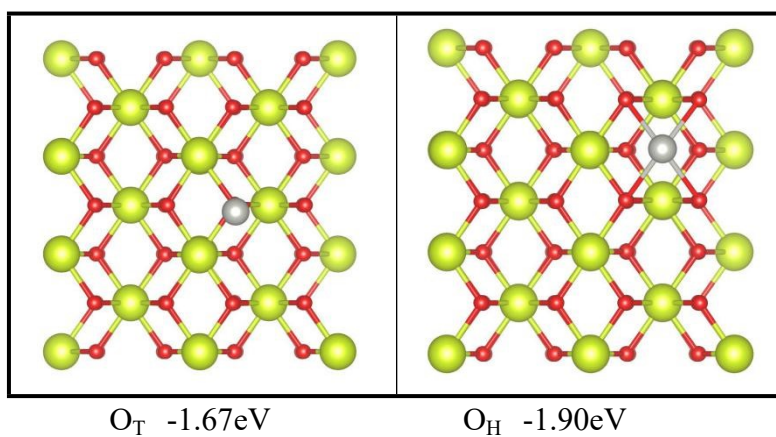

**Table S1.** Optimized adsorption configurations and adsorption energies (in eV) on Pd/CeO<sub>2</sub>

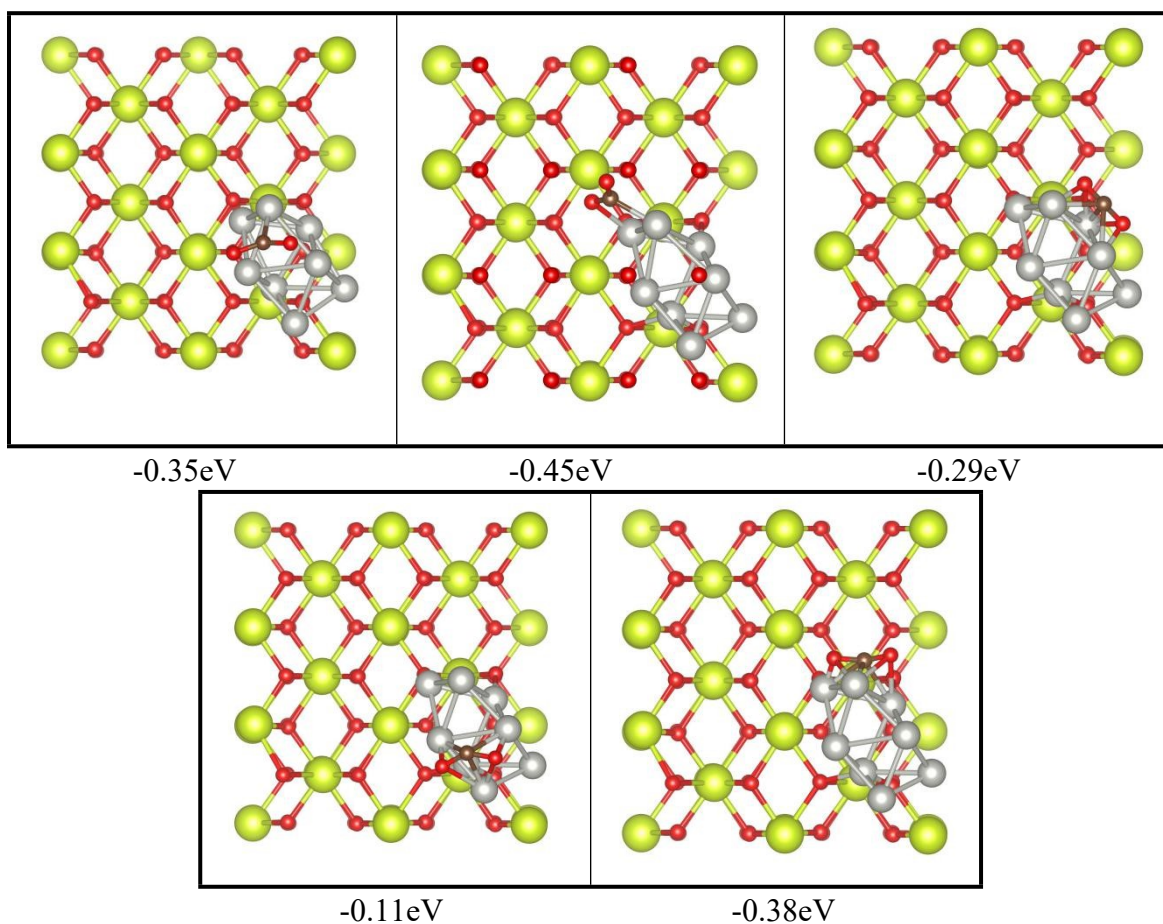

**Table S2.** Optimized adsorption configurations and adsorption energies (in eV) of CO<sub>2</sub> on Pd<sub>8</sub>/CeO<sub>2</sub>

**Table S3.** Possible reduction steps in the electrochemical reduction of CO<sub>2</sub> on Pd/Pd<sub>8</sub>/-CeO<sub>2</sub> and the corresponding reaction free energies ( $\Delta G$ ) at 0 V (vs. RHE)

| Elementary steps                                                                                            | $\Delta G(\text{eV})$             |                     |
|-------------------------------------------------------------------------------------------------------------|-----------------------------------|---------------------|
|                                                                                                             | Pd <sub>8</sub> /CeO <sub>2</sub> | Pd/CeO <sub>2</sub> |
| $\text{CO}_2 + * \rightarrow * \text{CO}_2$                                                                 | -0.08                             | -0.98               |
| $* \text{CO}_2 + \text{H}^+ + \text{e}^- \rightarrow * \text{COOH}$                                         | 0.07                              | 0.8                 |
| $* \text{CO}_2 + \text{H}^+ + \text{e}^- \rightarrow * \text{OCHO}$                                         | 0.02                              | 0.3                 |
| $* \text{COOH} + \text{H}^+ + \text{e}^- \rightarrow * \text{CO} + \text{H}_2\text{O}$                      | -1.35                             | -1.26               |
| $* \text{COOH} + \text{H}^+ + \text{e}^- \rightarrow * \text{HCOOH}$                                        | 0.09                              | 0.6                 |
| $* \text{OCHO} + \text{H}^+ + \text{e}^- \rightarrow * \text{HCOOH}$                                        | 0.14                              | 1.10                |
| $* \text{HCOOH} \rightarrow * + \text{HCOOH}$                                                               | 0.3                               | -0.04               |
| $* \text{OCHO} + \text{H}^+ + \text{e}^- \rightarrow * \text{H}_2\text{COO}$                                | 1.47                              | 1.16                |
| $* \text{H}_2\text{COO} + \text{H}^+ + \text{e}^- \rightarrow * \text{H}_2\text{COOH}$                      | -0.66                             | -0.23               |
| $* \text{CO} + \text{H}^+ + \text{e}^- \rightarrow * \text{CHO}$                                            | 1.19                              | 1.6                 |
| $* \text{HCOOH} + \text{H}^+ + \text{e}^- \rightarrow * \text{CHO} + \text{H}_2\text{O}$                    | -0.24                             | -0.26               |
| $* \text{HCOOH} + \text{H}^+ + \text{e}^- \rightarrow * \text{H}_2\text{COOH}$                              | 0.67                              | -0.17               |
| $* \text{H}_2\text{COOH} + \text{H}^+ + \text{e}^- \rightarrow * \text{OCH}_3 + * \text{OH}$                | -0.51                             | -1.58               |
| $* \text{H}_2\text{COOH} + \text{H}^+ + \text{e}^- \rightarrow * \text{OCH}_2 + \text{H}_2\text{O}$         | -0.76                             | -1.05               |
| $* \text{H}_2\text{COOH} + \text{H}^+ + \text{e}^- \rightarrow \text{CH}_3\text{OH} + * \text{O}$           | 0.01                              | 1.61                |
| $* \text{OCH}_3 + * \text{OH} + \text{H}^+ + \text{e}^- \rightarrow \text{CH}_4 + * \text{O} + * \text{OH}$ | -0.51                             | 0.71                |
| $* \text{O} + * \text{OH} + \text{H}^+ + \text{e}^- \rightarrow 2 * \text{OH}$                              | -0.87                             | -1.93               |
| $2 * \text{OH} + \text{H}^+ + \text{e}^- \rightarrow * \text{OH} + \text{H}_2\text{O}$                      | 0.03                              | 0.93                |
| $* \text{OCH}_3 + * \text{OH} + \text{H}^+ + \text{e}^- \rightarrow \text{CH}_3\text{OH} + * \text{OH}$     | -0.11                             | 0.95                |
| $* \text{OCH}_3 + * \text{OH} + \text{H}^+ + \text{e}^- \rightarrow * \text{OCH}_3 + \text{H}_2\text{O}$    | 0.29                              | 1.52                |
| $* \text{CO} + \text{H}^+ + \text{e}^- \rightarrow * \text{COH}$                                            | 2.72                              | 2.74                |
| $* \text{COH} + \text{H}^+ + \text{e}^- \rightarrow * \text{C} + \text{H}_2\text{O}$                        | 1.08                              | 1.39                |
| $* \text{CHO} + \text{H}^+ + \text{e}^- \rightarrow * \text{CH}_2\text{O}$                                  | 0.15                              | -0.96               |
| $* \text{CHO} + \text{H}^+ + \text{e}^- \rightarrow * \text{CHOH}$                                          | 1.09                              | 0.15                |
| $* \text{CH}_2\text{O} + \text{H}^+ + \text{e}^- \rightarrow * \text{OCH}_3$                                | 0.54                              | 0.99                |
| $* \text{CH}_2\text{O} + \text{H}^+ + \text{e}^- \rightarrow * \text{CH}_2\text{OH}$                        | 0.05                              | 1.17                |
| $* \text{CHOH} + \text{H}^+ + \text{e}^- \rightarrow * \text{CH}_2\text{OH}$                                | -0.9                              | 0.06                |

|                                                                                                  |       |       |
|--------------------------------------------------------------------------------------------------|-------|-------|
| $*\text{CHOH} + \text{H}^+ + \text{e}^- \rightarrow * \text{CH} + \text{H}_2\text{O}$            | -1.19 | 1.33  |
| $*\text{OCH}_3 + \text{H}^+ + \text{e}^- \rightarrow \text{CH}_3\text{OH} + *$                   | -0.57 | -0.23 |
| $*\text{OCH}_3 + \text{H}^+ + \text{e}^- \rightarrow * \text{O} + \text{CH}_4$                   | -1.02 | 0.43  |
| $*\text{CH}_2\text{OH} + \text{H}^+ + \text{e}^- \rightarrow \text{CH}_3\text{OH} + *$           | -0.15 | -0.41 |
| $*\text{CH}_2\text{OH} + \text{H}^+ + \text{e}^- \rightarrow * \text{CH}_2 + \text{H}_2\text{O}$ | -0.03 | -0.37 |
| $* \text{C} + \text{H}^+ + \text{e}^- \rightarrow * \text{CH}$                                   | -2.7  | -1.06 |
| $* \text{CH} + \text{H}^+ + \text{e}^- \rightarrow * \text{CH}_2$                                | -0.21 | -1.64 |
| $* \text{CH}_2 + \text{H}^+ + \text{e}^- \rightarrow * \text{CH}_3$                              | -0.35 | -0.71 |
| $* \text{CH}_3 + \text{H}^+ + \text{e}^- \rightarrow \text{CH}_4 + *$                            | -0.47 | -0.57 |
| $* \text{O} + \text{H}^+ + \text{e}^- \rightarrow * \text{OH}$                                   | -0.62 | -2.24 |
| $* \text{OH} + \text{H}^+ + \text{e}^- \rightarrow \text{H}_2\text{O} + *$                       | -0.17 | 0.34  |

**Table S4.** The energy corrections of free molecules discussed

| Free molecules        | G(eV)   | E <sub>ele</sub> (eV) | ZPE(eV) | TS(eV) |
|-----------------------|---------|-----------------------|---------|--------|
| CO <sub>2</sub> (g)   | -23.24  | -22.975               | 0.306   | 0.566  |
| H <sub>2</sub> (g)    | -6.808  | -6.758                | 0.266   | 0.316  |
| CO(g)                 | -15.18  | -14.79                | 0.131   | 0.521  |
| H <sub>2</sub> O(l)   | -14.22  | -14.22                | 0.566   | 0.568  |
| HCOOH(g)              | -29.663 | -29.893               | 0.883   | 0.653  |
| CH <sub>4</sub> (g)   | 23.31   | -24.03                | 1.189   | 0.469  |
| CH <sub>3</sub> OH(l) | -29.48  | -30.21                | 1.354   | 0.624  |

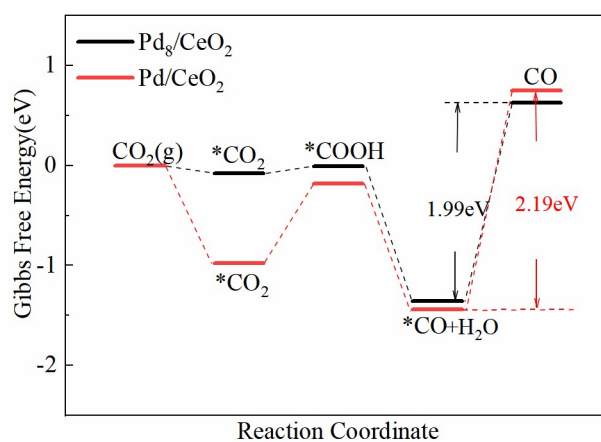

**Figure S5.** Gibbs Free energy diagram for CO production of CRR on Pd<sub>8</sub>/CeO<sub>2</sub> and Pd/CeO<sub>2</sub> (at 0V vs reversible hydrogen electrode).

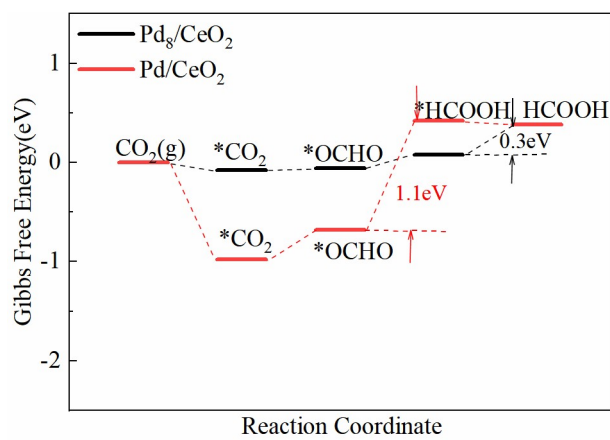

**Figure S6.** Gibbs Free energy diagram for HCOOH production of CRR on Pd<sub>8</sub>/CeO<sub>2</sub> and Pd/CeO<sub>2</sub> (at 0V vs reversible hydrogen electrode).



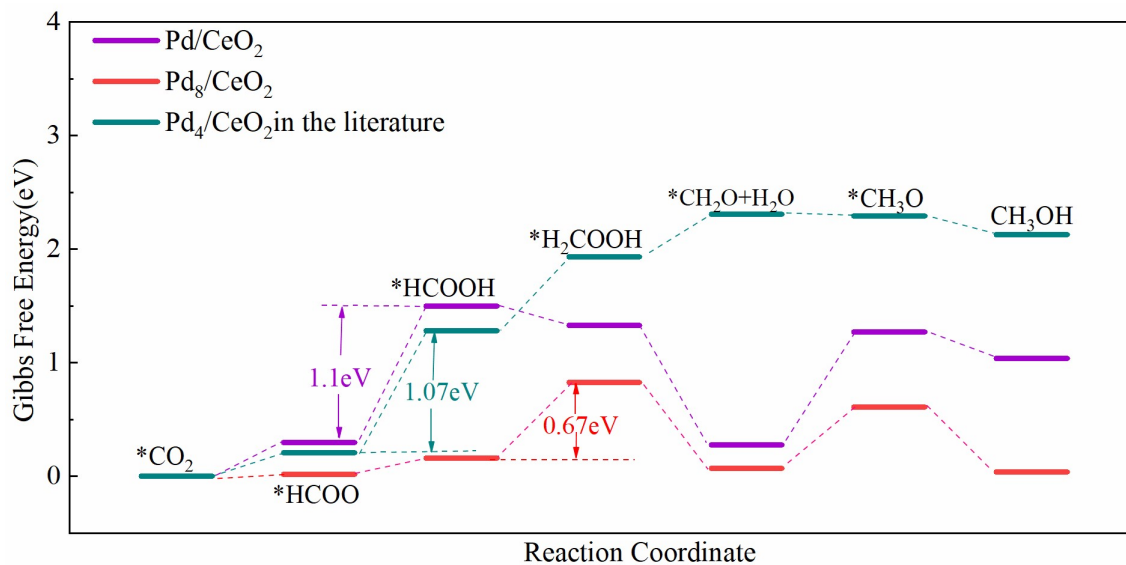

**Figure S7.** Free energy curves of  $\text{CH}_3\text{OH}$  production by CRR on  $\text{Pd}/\text{CeO}_2$ ,  $\text{Pd}_8/\text{CeO}_2$ , and  $\text{Pd}_4/\text{CeO}_2$  (0 V vs. reversible hydrogen electrode) in the literature.

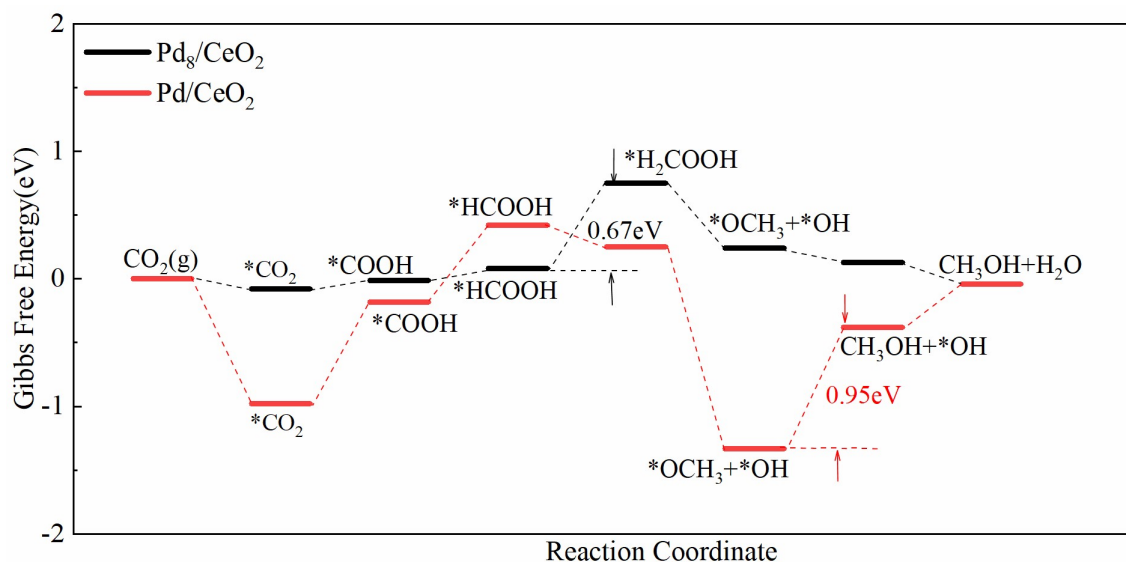

**Figure S8.** Gibbs Free energy diagram for  $\text{CH}_3\text{OH}$  production of CRR on  $\text{Pd}_8/\text{CeO}_2$  and  $\text{Pd}/\text{CeO}_2$  (at 0V vs reversible hydrogen electrode).

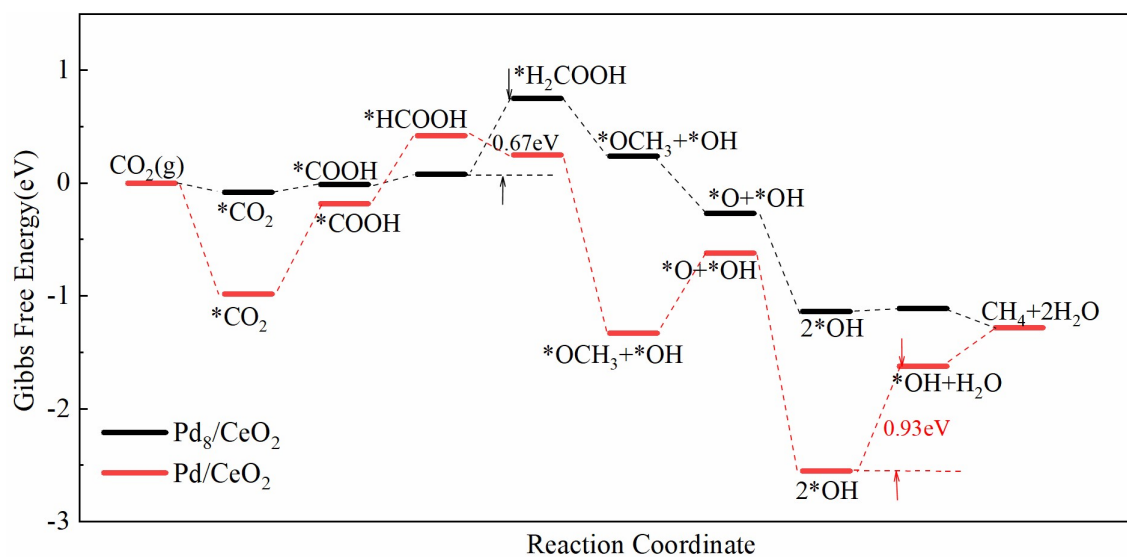

**Figure S9.** Gibbs Free energy diagram for CH<sub>4</sub> production of CRR on Pd<sub>8</sub>/CeO<sub>2</sub> and Pd/CeO<sub>2</sub> (at 0V vs reversible hydrogen electrode).

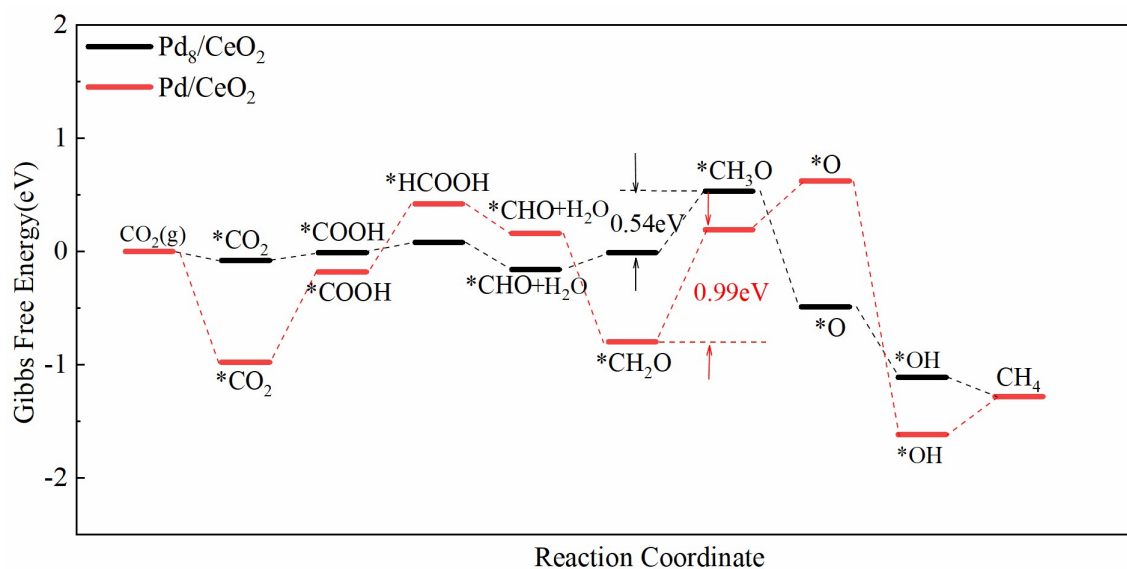

**Figure S10.** Gibbs Free energy diagram for CH<sub>4</sub> production of CRR on Pd<sub>8</sub>/CeO<sub>2</sub> and Pd/CeO<sub>2</sub> (at 0V vs reversible hydrogen electrode).

## Reference

- (1) J. Zhang, M. Dolg, *Physical chemistry chemical physics:PCCP*, 2015, **17**, 24173-24181.
- (2) D. Karaboga, *Computer Science*, 2005.
